# Supplementary material for: A field-deployed surface plasmon resonance (SPR) sensor for RDX quantification in environmental waters
Source: Royal Society of Chemistry journal article supplement (doi:10.1039/c7an00216e), 2017-01-01
Supplement: c7an00216e1.pdf [file c7an00216e1.pdf]

## Supporting information for:

### Field-deployed surface plasmon resonance (SPR) sensor for RDX quantification in environmental waters

Thibault Brulé<sup>a†</sup>, Geneviève Granger<sup>a†</sup>, Natalia Bukar<sup>a†</sup>, Clarisse Deschênes-Rancourt<sup>b</sup>, Thierry Havar<sup>a</sup>, Andreea R. Schmitzer<sup>a</sup>, Richard Martel<sup>b</sup> and Jean-Francois Masson<sup>a,c\*</sup>

<sup>a</sup> Department of Chemistry, Université de Montréal, C.P. 6128 Succ. Centre-Ville, Montreal, Quebec, H3C 3J7 Canada.

<sup>b</sup> Institut national de la recherche scientifique, Eau Terre Environnement Centre (ETE-INRS), 490 de la Couronne, G1K 9A9, Canada.

<sup>c</sup> Centre for Self-Assembled Chemical Structures (CSACS), 801 Sherbrooke St. West, Montreal, Quebec, H3A 2K6 Canada.

† These authors contributed equally to this article.

\* Contact author information: [jf.masson@umontreal.ca](mailto:jf.masson@umontreal.ca) ; Tel: +1-514-343-7342

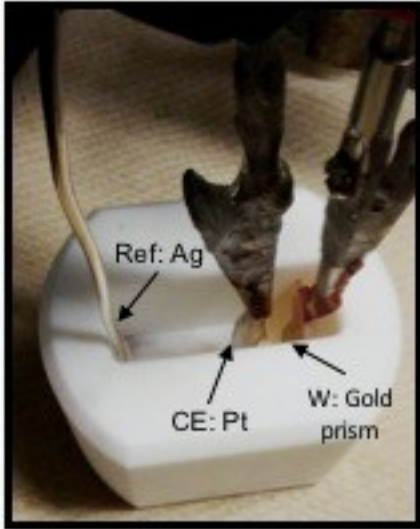

**Figure S1.** Photograph of the Teflon cell for electropolymerization.

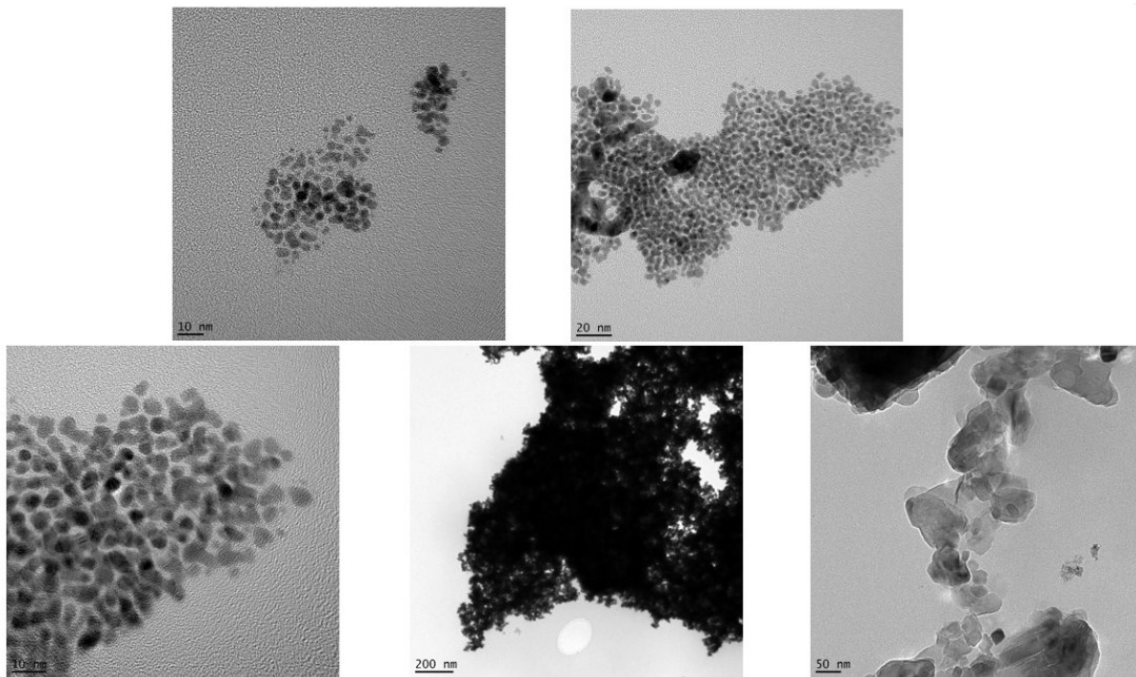

**Figure S2.** TEM images for the Au NP for the electropolymerization process.

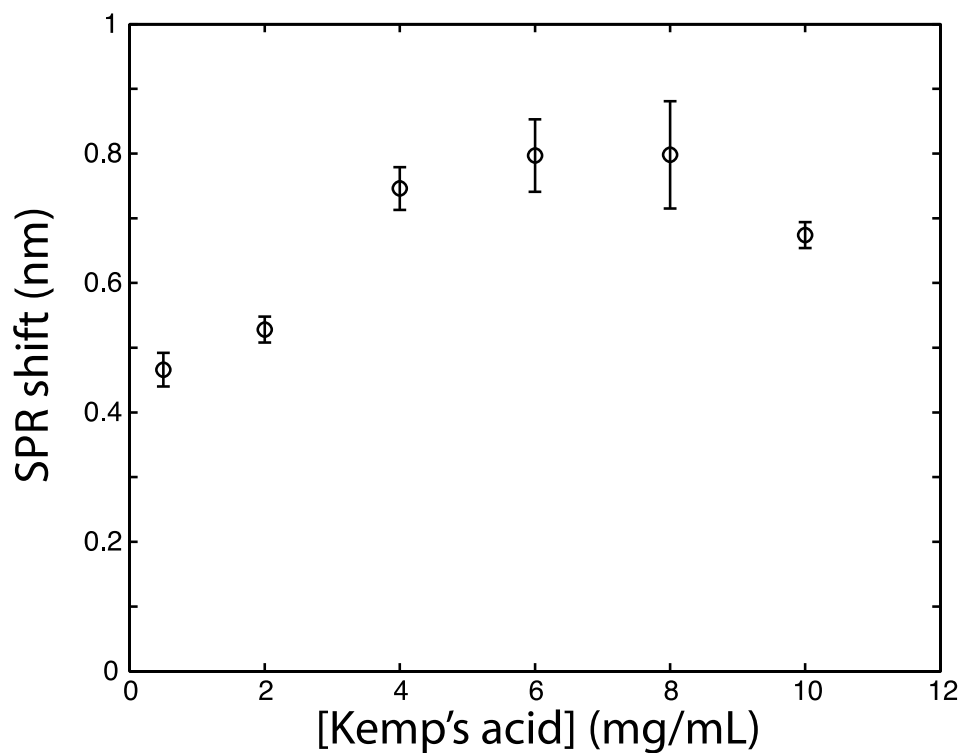

**Figure S3.** SPR response for 1 pM RDX measured with SPR sensors modified with MIP prepared at different concentration of the template molecule (Kemp's acid). The optimal concentration was in the range of 4 to 8 mg/mL. The error bars represent one standard deviation on a triplicate measurement ( $n = 3$ ).

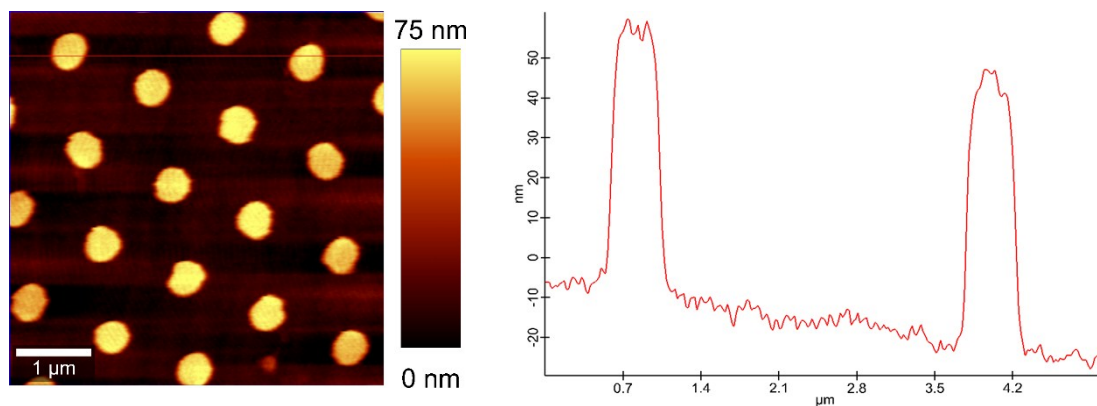

**Figure S4.** Left) AFM image and Right) cross section height of the bare gold-coated nanodisk array.

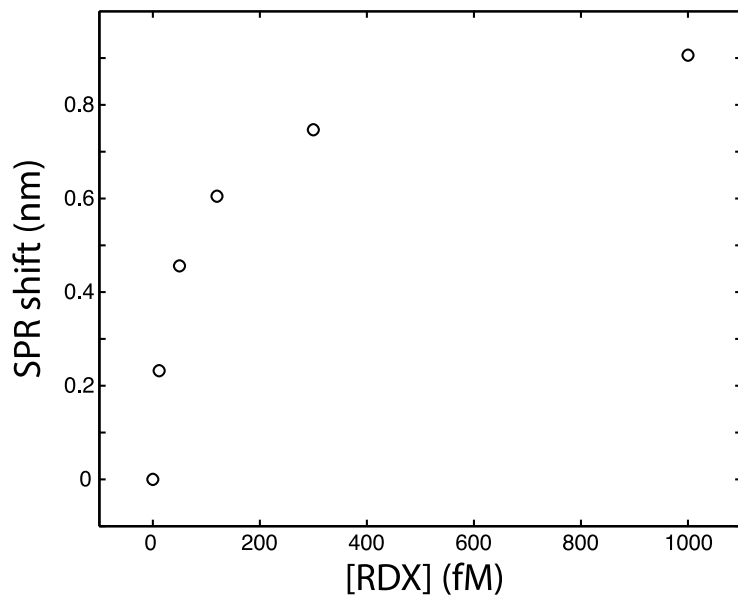

**Figure S5.** SPR response for RDX in the fM range, showing the Langmuir isotherm-like response at this concentration range.

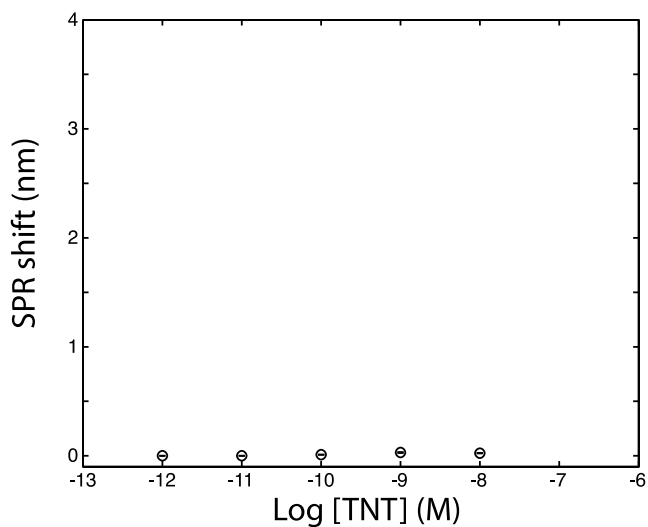

**Figure S6.** SPR response for TNT concentration from 1 pM to 10 nM using the RDX sensor, showing the absence of response for TNT. The error bars represent one standard deviation on a triplicate measurement ( $n = 3$ ), note that error bars are smaller than the size of the data points.

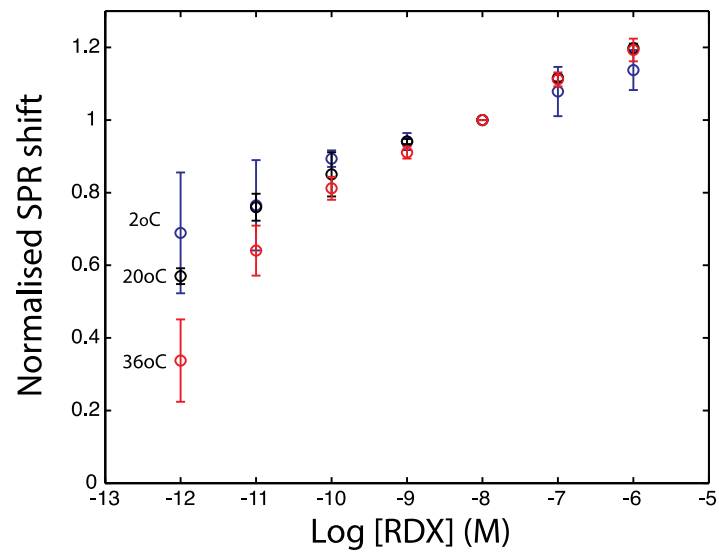

**Figure S7.** Normalised calibration curves for RDX at different temperatures. The sensitivity was higher for higher temperatures, but using the normalisation at 10 nM allowed minimal drift at the environmentally relevant concentration range.

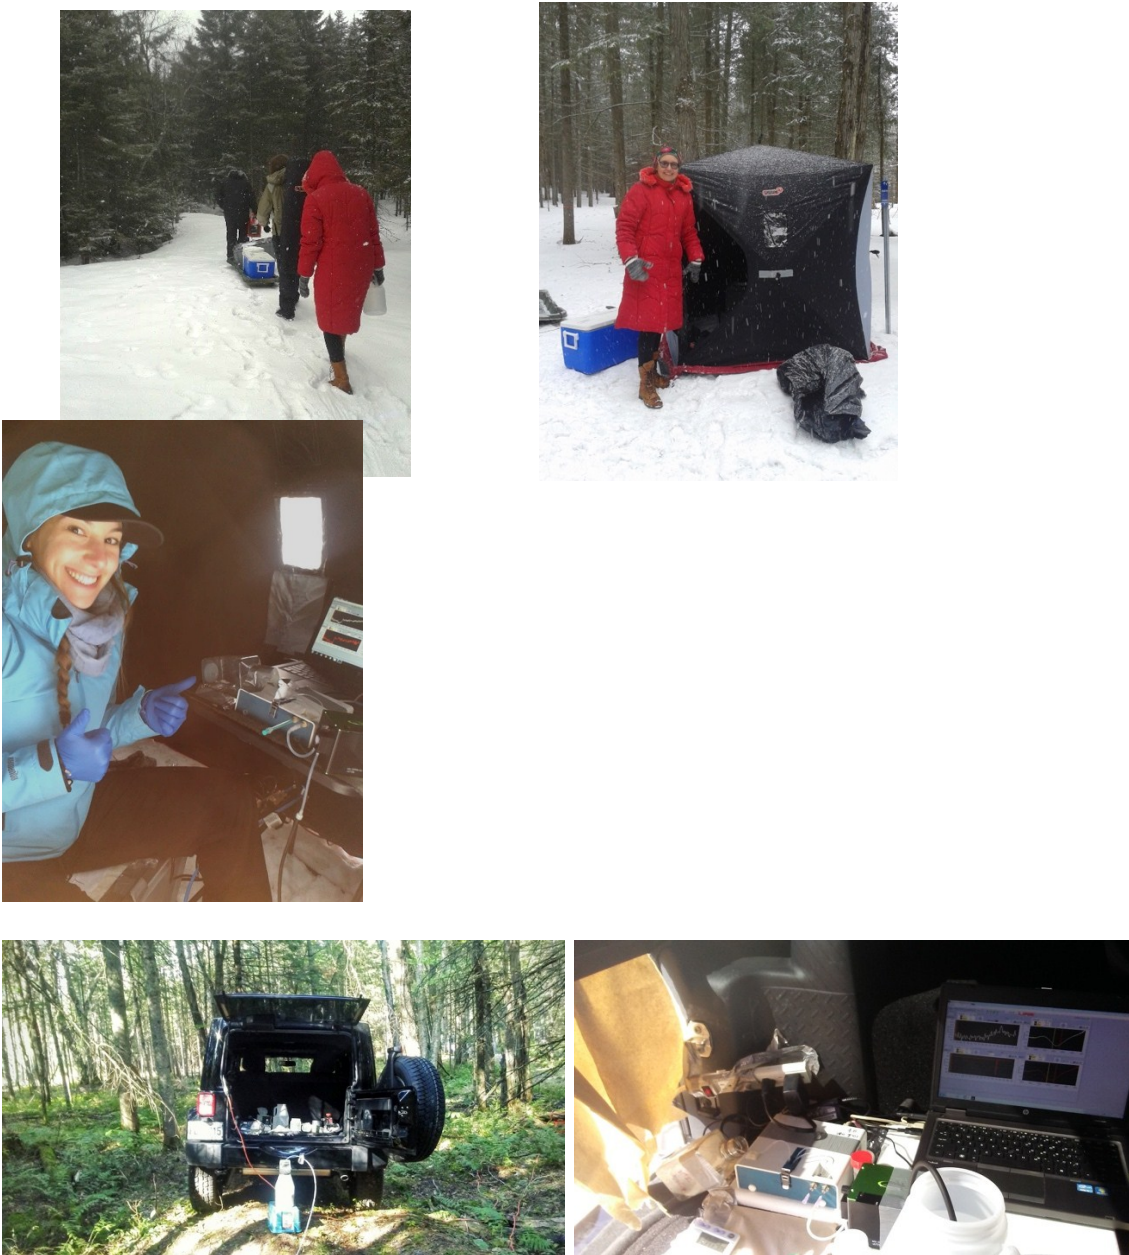

**Figure S8.** Photographs of the SPR instrument deployed in winter (Top) and summer (Bottom) conditions.
